# Supplementary material for: Long non-coding RNAs as prognostic biomarkers in papillary renal cell carcinoma
Source: PubMed Central journal article supplement — Oncol Lett. 2019 Jul 29;18(4):3691–7. doi: 10.3892/ol.2019.10684 (PMC6732993; doi:10.3892/ol.2019.10684), 2019-07-29
Supplement: Supplementary_Data.pdf [file Supplementary_Data.pdf]

Table SI. Long non-coding RNA sequences acquired from lncRNAMap.

| Gene name  | Ensembl version | Sequence                                                                                                                                                                                                                                                                                                                                                                                                                                                                                                                                                                                                                                                                                                                                                                                                                                                        |
|------------|-----------------|-----------------------------------------------------------------------------------------------------------------------------------------------------------------------------------------------------------------------------------------------------------------------------------------------------------------------------------------------------------------------------------------------------------------------------------------------------------------------------------------------------------------------------------------------------------------------------------------------------------------------------------------------------------------------------------------------------------------------------------------------------------------------------------------------------------------------------------------------------------------|
| AC024022.1 | ENSG00000250781 | GAGCTGGCTTTTCAGCAGGGTTTAGAGCAGCACGAAAAGTGAAC TGACC<br>CTGGAAAAATGAATCCACACGTTTCATGGAGTCATAGAACCTAAGGGTTG<br>AAAAGAACCCTTAAGGCCAGGCACGGTGGCTCACCTCTGTAATCCCAGC<br>ACTTTGGGAGACCGAGGCAGGCGGATCACGAGTCTGCAGCCGCCATTT<br>GTGGAGA ACTGCATTTCACTCCATTCATGAAGAATCTACGAGCGCCC<br>TCTAGAGGAATTTTCTCTCTTTACATCTACACACGGTGAAAAGGGCCA<br>ACTAGGGCTGCT CTTGTCCGGGCTGAATTCTGGAAAGCATCAATTTCTC<br>AGGATATATATGCAGCGTTTAAGTACATTTTCTGCGAGAAGCAGATGCAT<br>TGGTTTGCAAGTCAGAGCGAAAGCCAGTGCTGCTGTTTCAGAGTCAGAGC<br>TGGGCAGGATGAAGTTTAATGAACATTATTAACCATTGAGAAGATGCATT<br>TCTTGCTG AGTAGCCCCCAGGGCAGACGACAGCTCAGTCACCCTGGAA<br>GAATTCAACCAGAAAAAGACCTCACAAACCGACAGTTCTGTGCTAGTGA<br>GAACCATTATT                                                                                                                                                                                      |
| AC087379.2 | ENSG00000254695 | ATAGGAGTTCATTTTGTGAAGCTGTCACGAGTTTTCCAGTAGACCATGA<br>GCTTGCTGATGGCAGGAGCCTGCCTGTCCTTGATCCTTGTTCCTGTGGG<br>GTCTATCCCAGTGCCTGGCACAGTGGCTTTGGAGATGGAAGGAATAGAG<br>GGAGAGCAGATCCTCAAACACAGCCTGCATCTCTCCCTGCTCCCCTCCC<br>ACCCTCCAGTTTTTCCAGCCAGAGGCATTTGCTCTAAGGCCCAGGCTGTG<br>GCCACCTATCACCGCTACCCAAGTAGTACAGGAAAAGGAAATTTGAAG<br>AGGAAAAGAGGCACCAGGGATGAGGACACACCGAGAAAAGACCATGT<br>GAAGACATGGCGAGAAGACAGCCAGCTGCAAGCCAAGGAGTGAGGCC<br>TCAGAAGAAACCAACCCTGCCGACACCTTGACCTTGGACTTCTAGTCTC<br>TAGAATTATGCGAAAATAAATTCCTGTTGTTTAA                                                                                                                                                                                                                                                                                                                                     |
| GAS6-AS1   | ENSG00000233695 | CGTGTAAGAAGTGCCTTTTGCCTCCCACCGTGATTCTGAGGCCTCCCCA<br>ACCATGTGCAATTGCACAGGCCCAGGCTGAAGAGGAAAGACAAGAGC<br>CGCCCTGCCAGAAACGTCCACATGTGGGTACTGCATTCCCTACCGGTGT<br>GACAGCTTGAGGCCCCACGCCCCGTCACAGTGGCAGGTGTAGCTCCCTG<br>GGGAGTTCACGCAGACCTGCTCACAGCGGCCCTGCAGACACTCGTCCAC<br>ATCTGCCAGCCAGAGGGAAGCGGCGGTGAGCCGGGGAGGCCTCTACGC<br>TGTCCCGCCGTGGGATCACACCGGATTGCTCAAACCACACGCAAGGTC<br>CTGCCATCAGAGGAGAGCTCGAAGCCGCTGTGGCAGGAACAGTGGAAG<br>CTACCCGGCTTGTGTGGCAGATCTGGAGGCAGCCCCGTTCTCCTGGC<br>TGCATTCTGTTGACATCTGGGAACAAGCACAGGCCTGAAGGGGAGCCCCA<br>AGGGTGCACAGCCCCTGGCTACGGAGGAGGCTGCAGGCCAGGAGTGAC<br>CTCTGGGTGCCGAGGACAGACAAGGCCAGGCCA GAGCTGGCCACTCCT<br>TAGCAAAGCCCTCCCAGGCCACCTGTGGGGTAGGATTTGCCAAAGGGGA<br>CAGGCTGGCCTGCTGGGCTCTCCACTATGGGTCTCCACCAGGCCCTGGA<br>GCTATTCTTCTCCAGGGTCTTCACTGACACCACAGGTCTACACTGAAGG<br>ACGGTCAGAGGTGAAATCTCCCCCGGCCTTTCAATCAGTGGGT |
